# Supplementary material
Source: PubMed Central journal article supplement (PMC3486237)
Supplement: JCM.02038-12_zjm999091994so1.pdf [file JCM.02038-12_zjm999091994so1.pdf]

**TABLE S1.** Disc diffusion of randomly collected isolates from Creighton University Medical Center

| Drug <sup>a</sup> | <i>E. coli</i> (n = 106) |           |            | <i>K. pneumoniae</i> (n = 10) |           |           | <i>K. oxytoca</i> (n = 4) |           |            |
|-------------------|--------------------------|-----------|------------|-------------------------------|-----------|-----------|---------------------------|-----------|------------|
|                   | S                        | I         | R          | S                             | I         | R         | S                         | I         | R          |
| <b>AMP</b>        | 31.9% (23)               | 5.5% (4)  | 62.5% (45) | 50.0% (2)                     | 0         | 50.0% (2) | 0                         | 0         | 100.0% (2) |
| <b>AMC</b>        | 72.7% (16)               | 13.6% (3) | 13.6% (3)  | 80.0% (4)                     | 20.0% (1) | 0         | 0                         | 0         | 0          |
| <b>FEP</b>        | 98.7% (76)               | 1.3% (1)  | 0          | 0                             | 0         | 0         | 0                         | 0         | 0          |
| <b>CPD</b>        | 91.4% (64)               | 2.9% (2)  | 5.7% (4)   | 50.0% (4)                     | 0         | 50.0% (4) | 100.0% (1)                | 0         | 0          |
| <b>CRO</b>        | 95.8% (69)               | 0         | 4.2% (3)   | 100.0% (3)                    | 0         | 0         | 100.0% (2)                | 0         | 0          |
| <b>KAN</b>        | 80.0% (20)               | 20.0% (5) | 0          | 100.0% (3)                    | 0         | 0         | 0                         | 0         | 0          |
| <b>CIP</b>        | 67.2% (45)               | 3.0% (2)  | 29.9% (20) | 71.4% (5)                     | 0         | 28.6% (2) | 33.3% (1)                 | 0         | 66.7% (2)  |
| <b>LEX</b>        | 90.9% (20)               | 0         | 9.1% (2)   | 66.6% (4)                     | 0         | 33.3% (2) | 0                         | 0         | 0          |
| <b>TZP</b>        | 95.9% (70)               | 0         | 4.1% (3)   | 60.0% (3)                     | 0         | 40.0% (2) | 0                         | 0         | 0          |
| <b>SXT</b>        | 73.1% (49)               | 0         | 26.9% (18) | 57.1% (4)                     | 0         | 42.9% (3) | 75.0% (3)                 | 0         | 25.0% (1)  |
| <b>ATM</b>        | 83.3% (45)               | 3.7% (2)  | 13.0% (7)  | 75.0% (3)                     | 0         | 25.0% (1) | 0                         | 0         | 0          |
| <b>ETP</b>        | 100.0% (3)               | 0         | 0          | 0                             | 0         | 0         | 0                         | 0         | 0          |
| <b>GEN</b>        | 90.9% (40)               | 0         | 9.1% (4)   | 100.0% (3)                    | 0         | 0         | 100.0% (2)                | 0         | 0          |
| <b>CFZ</b>        | 43.2% (16)               | 13.5% (5) | 43.2% (16) | 0                             | 62.5% (5) | 37.5% (3) | 75.0% (3)                 | 25.0% (1) | 0          |
| <b>SAM</b>        | 59.5% (25)               | 11.9% (5) | 28.6% (12) | 20.0% (1)                     | 40.0% (2) | 40.0% (2) | 50.0% (1)                 | 50.0% (1) | 0          |
| <b>NIT</b>        | 98.6% (73)               | 0         | 1.4% (1)   | 0                             | 0         | 0         | 0                         | 0         | 0          |

<sup>a</sup>AMP; ampicillin AMC; ampicillin-clavulanate FEP; cefepime CPD; cefpodoxime CRO; ceftriaxone KAN; kanamycin CIP; ciprofloxacin LEX; cephalexin TZP; piperacillin-tazobactam SXT; trimethoprim-sulfamethoxazole ATM; aztreonam ETP; ertapenem GEN; gentamicin; CFZ cephazolin SAM; ampicillin/sulbactam NIT; nitrofurantoin
